# Supplementary material for: Association between INDELs in MicroRNAs and Susceptibility to Gastric Cancer in Amazonian Population
Source: MDPI journal article supplement (doi:10.3390/genes14010060), 2022-12-24
Supplement: s1 [file s1]

## SUPPLEMENTARY MATERIALS

**Table S1. Genotypic and allelic frequency of the 11 INDELs regarding susceptibility to GC. Data presented as percentage of patients with GC/percentage of controls. dbSNP: Genetic variant record in the NCBI database. HWE: Hardy–Weinberg Equilibrium.**

| Gene                | dbSNP       | Case/control ( <i>n</i> = 301/145) |           |           |                   |                  |       |                   |
|---------------------|-------------|------------------------------------|-----------|-----------|-------------------|------------------|-------|-------------------|
|                     |             | Genotype frequency                 |           |           |                   | Allele frequency |       | HWE               |
|                     |             | II                                 | ID        | DD        | <i>P</i><br>value | I                | D     | <i>P</i><br>value |
| <i>MIRNA630</i>     | rs139334001 | 89,7/92,4                          | 9,0/7,6   | 1,3/0,0   | 0,440             | 94,8             | 5,16  | 0,023             |
| <i>MIRNA516B_2</i>  | rs10670323  | 1,0/2,1                            | 19,0/19,4 | 80/78,5   | 0,66              | 10,5             | 89,5  | 0,631             |
| <i>MIRNA4463</i>    | rs5877455   | 28,6/41,6                          | 49,8/43,1 | 21,5/15,3 | 0,023             | 56,5             | 43,4  | 0,558             |
| <i>MIRNA3171</i>    | rs35170395  | 69,2/75                            | 24/25     | 6,8/0     | 0,001             | 83,2             | 16,74 | 0,009             |
| <i>MIRNA3945</i>    | rs145931056 | 80,3/88,8                          | 18,4/9,8  | 1,4/1,4   | 0,055             | 90,8             | 9,15  | 0,239             |
| <i>MIRNA548H_4</i>  | rs150141473 | 74,8/83,9                          | 24,1/15,4 | 1,0/0,7   | 0,090             | 88,4             | 11,5  | 0,489             |
| <i>MIRNA548AJ_2</i> | rs145326096 | 67,2/75,9                          | 9,6/7,6   | 23,2/16,6 | 0,166             | 74,5             | 25,4  | 0,000             |
| <i>MIRNA302C</i>    | rs199971565 | 96,6/100                           | 2/0,0     | 1,4/0,0   | 0,076             | 98,4             | 1,59  | 0,000             |
| <i>MIRNA4274</i>    | rs202195689 | 90,9/85,2                          | 8,4/14,8  | 0,7/0,0   | 0,092             | 94,2             | 5,7   | 0,642             |
| <i>MIRNA920</i>     | rs66686007  | 91,5/82,1                          | 8,2/16,6  | 0,3/1,4   | 0,015             | 93,8             | 6,15  | 0,217             |
| <i>MIRNA3652</i>    | rs62747560  | 62,2/62,7                          | 35,0/27,5 | 2,7/9,9   | 0,004             | 78,6             | 21,3  | 0,567             |

**Table S2. Allelic variants in MIRNAs associations for GC predisposition. Logistic regression analysis with Bonferroni correction. Genotypes: Del / Del = homozygous deletion, Del / Ins = heterozygous, and Ins-Ins = homozygous insertion.**

| Gene                           | Model                              | OR (IC 95%)      | P value |
|--------------------------------|------------------------------------|------------------|---------|
| <i>MIRNA630_rs139334001</i>    | Ins / Ins vs Del / Ins + Del / Del | 1,40 (0,68-2,88) | 0,344   |
|                                | Ins / Ins + Del / Ins vs Del / Del | 1,00 (0,68-2,0)  | 0,308   |
| <i>MIRNA516B_2_rs10670323</i>  | Ins / Ins vs Del / Ins + Del / Del | 1,00 (0,50-1,50) | 0,37    |
|                                | Ins / Ins + Del / Ins vs Del / Del | 0,91 (0,56-1,48) | 0,709   |
| <i>MIRNA4463_rs5877455_</i>    | Ins / Ins vs Del / Ins + Del / Del | 1,78 (1,16-2,71) | 0,007   |
|                                | Ins / Ins + Del / Ins vs Del / Del | 1,00 (0,65-1,65) | 0,122   |
| <i>MIRNA3171_rs35170395</i>    | Ins / Ins vs Del / Ins + Del / Del | 1,34 (0,85-2,10) | 0,203   |
|                                | Ins / Ins + Del / Ins vs Del / Del | 1,00 (0,42-1,50) | 0       |
| <i>MIRNA3945_rs145931056</i>   | Ins / Ins vs Del / Ins + Del / Del | 1,95 (1,08-3,53) | 0,021   |
|                                | Ins / Ins + Del / Ins vs Del / Del | 1,00 (0,18-5,37) | 0,974   |
| <i>MIRNA548H_4_rs150141473</i> | Ins / Ins vs Del / Ins + Del / Del | 1,75 (1,05-2,95) | 0,028   |
|                                | Ins / Ins + Del / Ins vs Del / Del | 1,00 (0,15-14,2) | 0,734   |
| <i>MIR548Aj_2_rs145326096</i>  | Ins / Ins vs Del / Ins + Del / Del | 1,53 (0,97-2,41) | 0,06    |
|                                | Ins / Ins + Del / Ins vs Del / Del | 1,00 (0,91-2,55) | 0,102   |
| <i>MIRNA302C_rs199971565</i>   | Ins / Ins vs Del / Ins + Del / Del | 1,00 (0,30-1,80) | 0,034   |
|                                | Ins / Ins + Del / Ins vs Del / Del | 1,00 (0,35-2,00) | 0,307   |
| <i>MIRNA4274_rs202195689</i>   | Ins / Ins vs Del / Ins + Del / Del | 0,58 (0,31-1,06) | 0,081   |
|                                | Ins / Ins + Del / Ins vs Del / Del | 1,00 (0,80-2,00) | 1       |
| <i>MIRNA920_rs66686007</i>     | Ins / Ins vs Del / Ins + Del / Del | 0,43 (0,24-0,77) | 0,004   |
|                                | Ins / Ins + Del / Ins vs Del / Del | 0,24 (0,02-2,71) | 0,232   |
| <i>MIRNA3652_rs62747560</i>    | Ins / Ins + Ins / Del vs Del / Del | 0,26 (0,10-0,62) | 0,002   |
|                                | Ins / Ins vs Del / Ins + Del / Del | 1,02 (0,67-1,54) | 0,93    |

**Table S3. Significant associations of insertions and deletions in the analysis of the 11 INDELs regarding clinical variants in the GC. Genotypes: Del / Del = homozygous deletion, Del / Ins = heterozygous, and Ins-Ins = homozygous insertion.**

|                         |                                    | OR (IC 95%)       | P value |
|-------------------------|------------------------------------|-------------------|---------|
| MIRNA630_rs139334001    | Ins / Ins vs Del / Ins + Del / Del | 1,01 (0,46-2,21)  | 0,975   |
|                         | Ins / Ins + Del / Ins vs Del / Del | 1,00 (0,20-10,38) | 0,718   |
| MIRNA516B_2_rs10670323  | Ins / Ins vs Del / Ins + Del / Del | 1,00 (0,30-2,10)  | 0,514   |
|                         | Ins / Ins + Del / Ins vs Del / Del | 1,43 (0,79-2,61)  | 0,242   |
| MIRNA4463_rs5877455_    | Ins / Ins vs Del / Ins + Del / Del | 2,30 (1,27-4,18)  | 0,004   |
|                         | Ins / Ins + Del / Ins vs Del / Del | 1,00 (0,83-2,22)  | 0,216   |
| MIRNA3171_rs35170395    | Ins / Ins vs Del / Ins + Del / Del | 0,88 (0,51-1,50)  | 0,636   |
|                         | Ins / Ins + Del / Ins vs Del / Del | 1,00 (0,21-1,78)  | 0,351   |
| MIRNA3945_rs145931056   | Ins / Ins vs Del / Ins + Del / Del | 1,22 (0,65-2,27)  | 0,539   |
|                         | Ins / Ins + Del / Ins vs Del / Del | 1,00 (0,05-4,79)  | 0,52    |
| MIRNA548H_4_rs150141473 | Ins / Ins vs Del / Ins + Del / Del | 1,46 (0,84-2,53)  | 0,179   |
|                         | Ins / Ins + Del / Ins vs Del / Del | 1,00 (0,07-8,43)  | 0,816   |
| MIR548AJ_2_rs145326096  | Ins / Ins vs Del / Ins + Del / Del | 1,41 (0,84-2,37)  | 0,199   |
|                         | Ins / Ins + Del / Ins vs Del / Del | 1,00 (0,47-1,53)  | 0,574   |
| MIRNA302C_rs199971565   | Ins / Ins vs Del / Ins + Del / Del | 1,92 (0,50-7,31)  | 0,338   |
|                         | Ins / Ins + Del / Ins vs Del / Del | 1,00 (0,05-4,83)  | 0,524   |
| MIRNA4274_rs202195689   | Ins / Ins vs Del / Ins + Del / Del | 1,39 (0,57-3,39)  | 0,474   |
|                         | Ins / Ins + Del / Ins vs Del / Del | 1,00 (0,10-0,95)  | 0,402   |
| MIRNA920_rs66686007     | Ins / Ins vs Del / Ins             | 1,00 (0,19-1,62)  | 0,271   |
| MIRNA3652_rs62747560    | Ins / Ins vs Ins / Del + Del / Del | 0,97 (0,59-1,62)  | 0,922   |
|                         | Ins / Ins + Del / Ins vs Del / Del | 1,00 (0,56-17,29) | 0,178   |
| MIRNA630_rs139334001    | Ins / Ins vs Del / Ins + Del / Del | 0,83 (0,37-1,88)  | 0,659   |
|                         | Ins / Ins + Del / Ins vs Del / Del | 1,00 (0,20-10,38) | 0,01    |
| MIRNA516B_2_rs10670323  | Ins / Ins vs Del / Ins + Del / Del | 1,00 (0,03-7,57)  | 0,596   |
|                         | Ins / Ins + Del / Ins vs Del / Del | 1,22 (0,64-2,33)  | 0,534   |
| MIRNA4463_rs5877455_    | Ins / Ins vs Del / Ins + Del / Del | 2,20 (1,26-3,84)  | 0,005   |
|                         | Ins / Ins + Del / Ins vs Del / Del | 1,00 (0,71-2,57)  | 0,344   |
| MIRNA3171_rs35170395    | Ins / Ins vs Del / Ins + Del / Del | 0,81 (0,47-1,42)  | 0,469   |
|                         | Ins / Ins + Del / Ins vs Del / Del | 1,00 (0,21-1,47)  | 0,246   |
| MIRNA3945_rs145931056   | Ins / Ins vs Del / Ins + Del / Del | 0,78 (0,41-1,46)  | 0,435   |
|                         | Ins / Ins + Del / Ins vs Del / Del | 1,00 (0,02-1,48)  | 0,07    |
| MIRNA548H_4_rs150141473 | Ins / Ins vs Del / Ins + Del / Del | 0,90 (0,50-1,61)  | 0,72    |
|                         | Ins / Ins + Del / Ins vs Del / Del | 1,00 (0,02-2,54)  | 0,21    |
| MIR548AJ_2_rs145326096  | Ins / Ins vs Del / Ins + Del / Del | 2,01 (1,11-3,63)  | 0,017   |
|                         | Ins / Ins + Del / Ins vs Del / Del | 1,00 (0,66-2,33)  | 0,502   |
| MIRNA302C_rs199971565   | Ins / Ins vs Del / Ins + Del / Del | 3,86 (0,48-31,39) | 0,137   |
|                         | Ins / Ins + Del / Ins vs Del / Del | 1,00 (0,14-13,74) | 0,762   |
| MIRNA4274_rs202195689   | Ins / Ins vs Del / Ins + Del / Del | 0,62 (0,26-1,46)  | 0,283   |
|                         | Ins / Ins + Del / Ins vs Del / Del | 1,00 (0,10-0,95)  | 1       |
| MIRNA920_rs66686007     | Ins / Ins vs Del / Ins             | 3,02 (0,86-10,54) | 0,053   |
| MIRNA3652_rs62747560    | Ins / Ins vs Ins / Del + Del / Del | 0,73 (0,43-1,23)  | 0,24    |
|                         | Ins / Ins + Del / Ins vs Del / Del | 1,00 (0,21-17,25) | 0,545   |
| MIRNA630_rs139334001    | Ins / Ins vs Del / Ins + Del / Del | 1,58 (0,74-3,39)  | 0,232   |

|                         |                                    |                                                              |                    |       |
|-------------------------|------------------------------------|--------------------------------------------------------------|--------------------|-------|
|                         | Ins / Ins + Del / Ins vs Del / Del |                                                              | 1,00 (0,13-6,86)   | 0,961 |
| MIRNA516B_2_rs10670323  | Ins / Ins vs Del / Ins + Del / Del |                                                              | 1,00 (0,10-0,95)   | 0,237 |
|                         | Ins / Ins + Del / Ins vs Del / Del |                                                              | 1,33. (0,75-2,38)  | 0,331 |
| MIRNA4463_rs5877455_    | Ins / Ins vs Del / Ins + Del / Del |                                                              | 2,80 (1,64-4,80)   | 0     |
|                         | Ins / Ins + Del / Ins vs Del / Del |                                                              | 1,00 (0,19-1,62)   | 0     |
| MIRNA3171_rs35170395    | Ins / Ins vs Del / Ins + Del / Del |                                                              | 1,00 (0,01-0,06)   | 0     |
|                         | Ins / Ins + Del / Ins vs Del / Del |                                                              | 0,12 (0,07-0,21)   | 0     |
| MIRNA3945_rs145931056   | Ins / Ins vs Del / Ins + Del / Del |                                                              | 1,34 (0,74-2,42)   | 0,334 |
|                         | Ins / Ins + Del / Ins vs Del / Del | Early or late<br>diagnosis (less o<br>more than 40<br>years) | 1,00 (0,07-8,43)   | 0,058 |
| MIRNA548H_4_rs150141473 | Ins / Ins vs Del / Ins + Del / Del |                                                              | 0,97 (0,57-1,66)   | 0,918 |
|                         | Ins / Ins + Del / Ins vs Del / Del |                                                              | 1,00 (0,59-1,74)   | 0,969 |
| MIR548AJ_2_rs145326096  | Ins / Ins vs Del / Ins + Del / Del |                                                              | 1,00 (0,87-5,07)   | 0     |
|                         | Ins / Ins + Del / Ins vs Del / Del |                                                              | 7,41 (3,34-16,44)  | 0     |
| MIRNA302C_rs199971565   | Del / Del vs Ins / Del             |                                                              | 1,00 (0,14-7,15)   | 0,994 |
| MIRNA4274_rs202195689   | Ins / Ins vs Del / Ins + Del / Del |                                                              | 0,98 (0,44-2,19)   | 0,955 |
|                         | Ins / Ins + Del / Ins vs Del / Del |                                                              | 1,00 (0,13-6,86)   | 0,498 |
| MIRNA920_rs66686007     | Ins / Ins vs Del / Ins             |                                                              | 1,59 (0,67-3,80)   | 0,385 |
| MIRNA3652_rs62747560    | Ins / Ins vs Ins / Del + Del / Del |                                                              | 0,96 (0,59-1,55)   | 0,867 |
|                         | Ins / Ins + Del / Ins vs Del / Del |                                                              | 1,00 (0,07-2,04)   | 0,239 |
| MIRNA630_rs139334001    | Ins / Ins vs Del / Ins + Del / Del |                                                              | 0,23 (0,03-1,77)   | 0,08  |
|                         | Ins / Ins + Del / Ins vs Del / Del |                                                              | 1,00 (0,02-2,54)   | 1     |
| MIRNA516B_2_rs10670323  | Ins / Ins vs Del / Ins + Del / Del |                                                              | 1,00 (0,45-121,44) | 0,19  |
|                         | Ins / Ins + Del / Ins vs Del / Del |                                                              | 0,98 (0,38-2,52)   | 0,96  |
| MIRNA4463_rs5877455_    | Ins / Ins vs Del / Ins + Del / Del |                                                              | 0,52 (0,23-1,13)   | 0,105 |
|                         | Ins / Ins + Del / Ins vs Del / Del |                                                              | 1,00 (0,16-1,39)   | 0,141 |
| MIRNA3171_rs35170395    | Ins / Ins vs Del / Ins + Del / Del |                                                              | 0,65 (0,27-1,58)   | 0,326 |
|                         | Ins / Ins + Del / Ins vs Del / Del |                                                              | 1,00 (0,19-3,94)   | 0,845 |
| MIRNA3945_rs145931056   | Ins / Ins vs Del / Ins + Del / Del |                                                              | 0,59 (0,19-1,76)   | 0,315 |
|                         | Ins / Ins + Del / Ins vs Del / Del | Tumor staging<br>T1 vs T2 / T3 / T4                          | 1,00 (0,24-23,71)  | 0,183 |
| MIRNA548H_4_rs150141473 | Ins / Ins vs Del / Ins + Del / Del |                                                              | 0,75 (0,31-1,83)   | 0,52  |
|                         | Ins / Ins + Del / Ins vs Del / Del |                                                              | 1,00 (0,32-40,92)  | 0,344 |
| MIR548AJ_2_rs145326096  | Ins / Ins vs Del / Ins + Del / Del |                                                              | 0,62 (0,25-1,50)   | 0,27  |
|                         | Ins / Ins + Del / Ins vs Del / Del |                                                              | 1,00 (0,30-1,97)   | 0,572 |
| MIRNA302C_rs199971565   | Ins / Ins vs Del / Ins + Del / Del |                                                              | 0,00 (0,00 -0,00)  | 0,606 |
|                         | Ins / Ins + Del / Ins vs Del / Del |                                                              | 1,00 (0-0)         | 1     |
| MIRNA4274_rs202195689   | Ins / Ins vs Del / Ins             |                                                              | 0,4 (0,05-3,09)    | 0,314 |
| MIRNA920_rs66686007     | Ins / Ins vs Del / Ins             |                                                              | 0,42 (0,05-3,29)   | 0,352 |
| MIRNA3652_rs62747560    | Ins / Ins vs Ins / Del + Del / Del |                                                              | 1,48 (0,69-3,16)   | 0,316 |
|                         | Ins / Ins + Del / Ins vs Del / Del |                                                              | 1,00 (0,02-2,54)   | 1     |
